# Supplementary material for: Characterization of Soybean Protein Isolate-Food Polyphenol Interaction via Virtual Screening and Experimental Studies
Source: MDPI journal article supplement (doi:10.3390/foods10112813), 2021-11-16
Supplement: s1 [file s1]

Table S1. The docking scores of 33 commonly found food polyphenols

| Number | CAS         | Category      | Dietary Polyphenol                    | Docking Score<br>(kcal/mol) |
|--------|-------------|---------------|---------------------------------------|-----------------------------|
| 1      | 153-18-4    | flavonoid     | rutin                                 | -7.969                      |
| 2      | 148244-82-0 | lignan        | seco-isolariciresinol<br>diglucoside  | -7.694                      |
| 3      | 29106-49-8  | flavonoid     | Proanthocyanin B2                     | -7.526                      |
| 4      | 528-58-5    | flavonoid     | cyanidin chloride                     | -7.401                      |
| 5      | 117-39-5    | flavonoid     | quercetin                             | -7.352                      |
| 6      | 134-01-0    | flavonoid     | peonidin chloride                     | -7.297                      |
| 7      | 18829-70-4  | flavonoid     | (-)-catechin hydrate                  | -6.803                      |
| 8      | 490-46-0    | flavonoid     | L-epicatechin                         | -6.722                      |
| 9      | 528-48-3    | flavonoid     | fisetin                               | -6.654                      |
| 10     | 491-80-5    | flavonoid     | 5,7-dihydrox-4'-<br>methoxyisoflavone | -6.652                      |
| 11     | 60-82-2     | flavonoid     | phloretin                             | -6.648                      |
| 12     | 40957-83-3  | flavonoid     | glycitein                             | -6.584                      |
| 13     | 529-44-2    | flavonoid     | myricetin                             | -6.536                      |
| 14     | 970-74-1    | flavonoid     | (-)-epigallocatechin                  | -6.511                      |
| 15     | 520-18-3    | flavonoid     | kaempferol                            | -6.483                      |
| 16     | 989-51-5    | flavonoid     | (-)-epigallocatechin gallate          | -6.474                      |
| 17     | 490-79-9    | phenolic acid | 2,5-dihydroxybenzoic acid             | -6.458                      |
| 18     | 520-36-5    | flavonoid     | apigenin                              | -6.444                      |
| 19     | 501-36-0    | stilbene      | resveratrol                           | -6.428                      |
| 20     | 491-70-3    | flavonoid     | luteolin                              | -6.424                      |
| 21     | 60-81-1     | flavonoid     | phlorizin                             | -6.327                      |
| 22     | 552-58-9    | flavonoid     | eriodictyol                           | -6.275                      |
| 23     | 1257-08-5   | flavonoid     | (-)-epicatechin gallate               | -6.201                      |
| 24     | 446-72-0    | flavonoid     | genistein                             | -6.166                      |
| 25     | 99-50-3     | phenolic acid | 3,4-dihydroxybenzoic acid             | -5.905                      |
| 26     | 491-67-8    | flavonoid     | baicalein                             | -5.857                      |
| 27     | 486-66-8    | flavonoid     | daidzein                              | -5.846                      |
| 28     | 149-91-7    | phenolic acid | gallic acid                           | -5.646                      |
| 29     | 458-37-7    | flavonoid     | curcumin                              | -5.32                       |
| 30     | 1135-24-6   | phenolic acid | ferulic acid                          | -5.289                      |
| 31     | 327-97-9    | phenolic acid | chlorogenic acid                      | -5.164                      |
| 32     | 331-39-5    | phenolic acid | caffeic acid                          | -4.955                      |
| 33     | 10236-47-2  | flavonoid     | naringin                              | -4.757                      |
